# Supplementary material for: Multivariate Analysis of Water Quality Data for Drinking Water Supply Systems
Source: MDPI journal article supplement (doi:10.3390/w13131766), 2021-06-26
Supplement: s1 [file s1]

## ANNEX I

**Table S1.** Correlation matrix– District of Bologna

|                               | 1       | 2       | 3       | 4       | 5       | 6       | 7       | 8       | 9       | 10      | 11      | 12      |
|-------------------------------|---------|---------|---------|---------|---------|---------|---------|---------|---------|---------|---------|---------|
| <b>Bicarbonate Alkalinity</b> | 1       | 0.9996  | 0.9619  | −0.4028 | −0.8757 | 0.9482  | 0.9708  | 0.9288  | 0.5162  | 0.5243  | 0.9252  | 0.7244  |
| <b>Total Alkalinity</b>       | 0.9996  | 1       | 0.9632  | −0.3992 | −0.8745 | 0.9483  | 0.9711  | 0.9256  | 0.5234  | 0.5217  | 0.9256  | 0.7229  |
| <b>Calcium</b>                | 0.9619  | 0.9632  | 1       | −0.4110 | −0.8817 | 0.9857  | 0.9921  | 0.9015  | 0.6874  | 0.6631  | 0.9738  | 0.8387  |
| <b>Chloride</b>               | −0.4028 | −0.3992 | −0.4110 | 1       | 0.6242  | −0.4666 | −0.4259 | −0.4225 | −0.2223 | −0.4533 | −0.4209 | −0.4462 |
| <b>pH</b>                     | −0.8757 | −0.8745 | −0.8817 | 0.6242  | 1       | −0.8996 | −0.8865 | −0.8304 | −0.5373 | −0.6452 | −0.8864 | −0.7862 |
| <b>Conductivity</b>           | 0.9482  | 0.9483  | 0.9857  | −0.4666 | −0.8996 | 1       | 0.9898  | 0.9299  | 0.6978  | 0.7454  | 0.9902  | 0.8843  |
| <b>Water Hardness</b>         | 0.9708  | 0.9711  | 0.9921  | −0.4259 | −0.8865 | 0.9898  | 1       | 0.9470  | 0.6759  | 0.6722  | 0.9800  | 0.8536  |
| <b>Magnesium</b>              | 0.9288  | 0.9256  | 0.9015  | −0.4225 | −0.8304 | 0.9299  | 0.9470  | 1       | 0.5918  | 0.6417  | 0.9243  | 0.8299  |
| <b>Nitrate</b>                | 0.5162  | 0.5234  | 0.6874  | −0.2223 | −0.5373 | 0.6978  | 0.6759  | 0.5918  | 1       | 0.7297  | 0.7396  | 0.8533  |
| <b>Potassium</b>              | 0.5243  | 0.5217  | 0.6631  | −0.4533 | −0.6452 | 0.7454  | 0.6722  | 0.6417  | 0.7297  | 1       | 0.7674  | 0.8911  |
| <b>Dry Residue</b>            | 0.9252  | 0.9256  | 0.9738  | −0.4209 | −0.8864 | 0.9902  | 0.9800  | 0.9243  | 0.7396  | 0.7674  | 1       | 0.9094  |
| <b>Sulphate</b>               | 0.7244  | 0.7229  | 0.8387  | −0.4462 | −0.7862 | 0.8843  | 0.8536  | 0.8299  | 0.8533  | 0.8911  | 0.9094  | 1       |

**Table S2.** Eigenvalues of each Principal Component and variance explained– District of Bologna.

| Principal Component | Eigenvalues | % Variance | Cumulated Variance |
|---------------------|-------------|------------|--------------------|
| PC1                 | 9.563       | 79.69      | 79.69              |
| PC2                 | 1.034       | 8.62       | 88.31              |
| PC3                 | 0.883       | 7.36       | 95.67              |
| PC4                 | 0.237       | 1.98       | 97.65              |
| PC5                 | 0.139       | 1.16       | 98.81              |
| PC6                 | 0.094       | 0.79       | 99.59              |
| PC7                 | 0.026       | 0.22       | 99.81              |
| PC8                 | 0.0113      | 0.09       | 99.91              |
| PC9                 | 0.0070      | 0.06       | 99.97              |
| PC10                | 0.00336     | 0.03       | 99.994             |
| PC11                | 0.00046     | 0.004      | 99.998             |
| PC12                | 0.00022     | 0.002      | 100                |

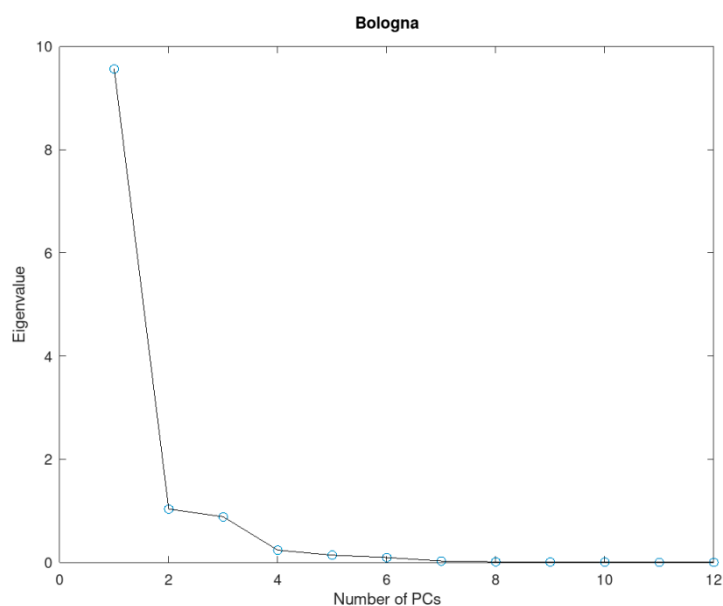

**Figure S1.** Scree plot – District of Bologna.

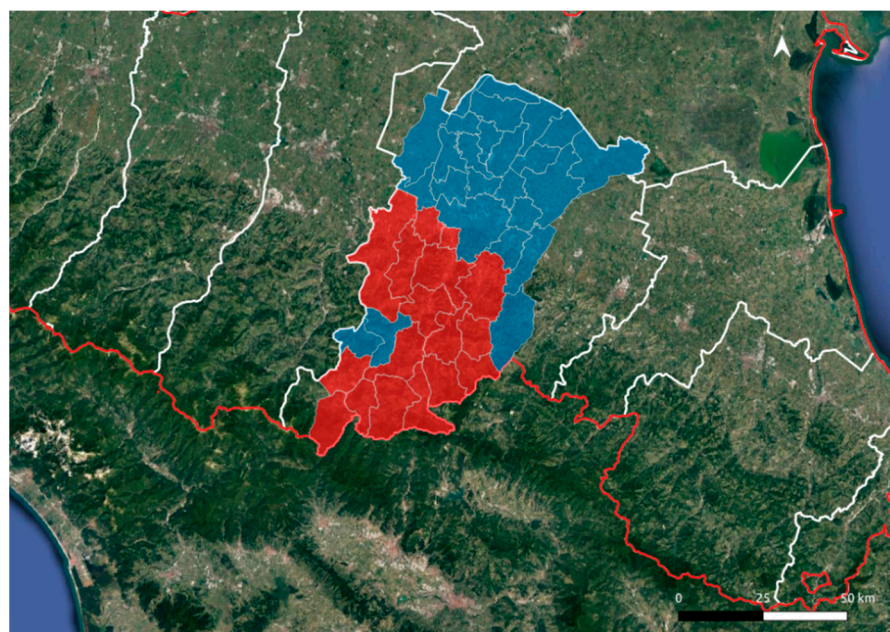

**Figure S2.** Georeferenced map of the district of Bologna with clusters highlighted (red: municipalities belonging to the first cluster; blue: municipalities belonging to the second cluster).

## ANNEX II

**Table S3.** Correlation matrix– District of Ferrara.

|                            | 1       | 2       | 3       | 4       | 5       | 6       | 7       | 8       | 9       | 10      | 11      |
|----------------------------|---------|---------|---------|---------|---------|---------|---------|---------|---------|---------|---------|
| Bicarbonate alkalinity     | 1       | 0.9989  | 0.9839  | −0.7971 | 0.9500  | 0.9883  | 0.9908  | −0.4037 | −0.6487 | 0.9529  | 0.9044  |
| Total Alkalinity           | 0.9989  | 1       | 0.9861  | −0.7840 | 0.9464  | 0.9890  | 0.9873  | −0.3883 | −0.6316 | 0.9538  | 0.9175  |
| Calcium                    | 0.9839  | 0.9861  | 1       | −0.7440 | 0.9204  | 0.9986  | 0.9862  | −0.3650 | −0.5327 | 0.9298  | 0.9524  |
| pH                         | −0.7971 | −0.7840 | −0.7440 | 1       | −0.6974 | −0.7686 | −0.8098 | 0.7361  | 0.6291  | −0.7323 | −0.6028 |
| Conductivity               | 0.9500  | 0.9464  | 0.9204  | −0.6974 | 1       | 0.9296  | 0.9451  | −0.1771 | −0.7528 | 0.9813  | 0.7940  |
| Water Hardness             | 0.9883  | 0.9890  | 0.9986  | −0.7686 | 0.9296  | 1       | 0.9930  | −0.3833 | −0.5566 | 0.9387  | 0.9372  |
| Magnesium                  | 0.9908  | 0.9873  | 0.9862  | −0.8098 | 0.9451  | 0.9930  | 1       | −0.4070 | −0.6242 | 0.9483  | 0.8966  |
| Nitrate (NO <sub>3</sub> ) | −0.4037 | −0.3883 | −0.3650 | 0.7361  | −0.1771 | −0.3833 | −0.4070 | 1       | 0.1879  | −0.2057 | −0.2895 |
| Potassium                  | −0.6487 | −0.6316 | −0.5327 | 0.6291  | −0.7528 | −0.5566 | −0.6242 | 0.1879  | 1       | −0.6726 | −0.3362 |
| Dry Residue                | 0.9529  | 0.9538  | 0.9298  | −0.7323 | 0.9813  | 0.9387  | 0.9483  | −0.2057 | −0.6726 | 1       | 0.8225  |
| Sulphate                   | 0.9044  | 0.9175  | 0.9524  | −0.6028 | 0.7940  | 0.9372  | 0.8966  | −0.2895 | −0.3362 | 0.8225  | 1       |

**Table S4.** Eigenvalues of each Principal Component and variance explained– District of Ferrara.

| Principal Component | Eigenvalues | % Variance | Cumulated Variance |
|---------------------|-------------|------------|--------------------|
| PC1                 | 8.825       | 80.229     | 80.229             |
| PC2                 | 1.159       | 10.538     | 90.767             |
| PC3                 | 0.809       | 7.359      | 98.126             |
| PC4                 | 0.118       | 1.071      | 99.198             |
| PC5                 | 0.059       | 0.537      | 99.735             |
| PC6                 | 0.024       | 0.221      | 99.956             |
| PC7                 | 0.003       | 0.026      | 99.982             |
| PC8                 | 0.002       | 0.016      | 99.997             |
| PC9                 | 0.0002      | 0.002      | 99.999             |
| PC10                | 0.0001      | 0.001      | 100                |
| PC11                | 0.0000      | 0.000      | 100                |

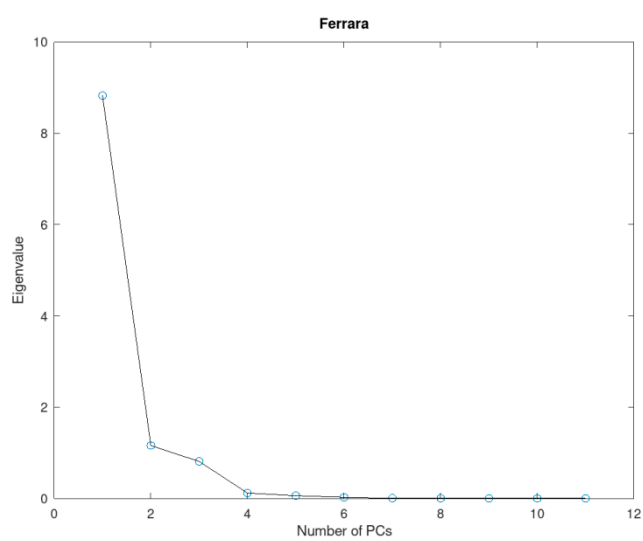

**Figure S3.** Scree plot – District of Ferrara.

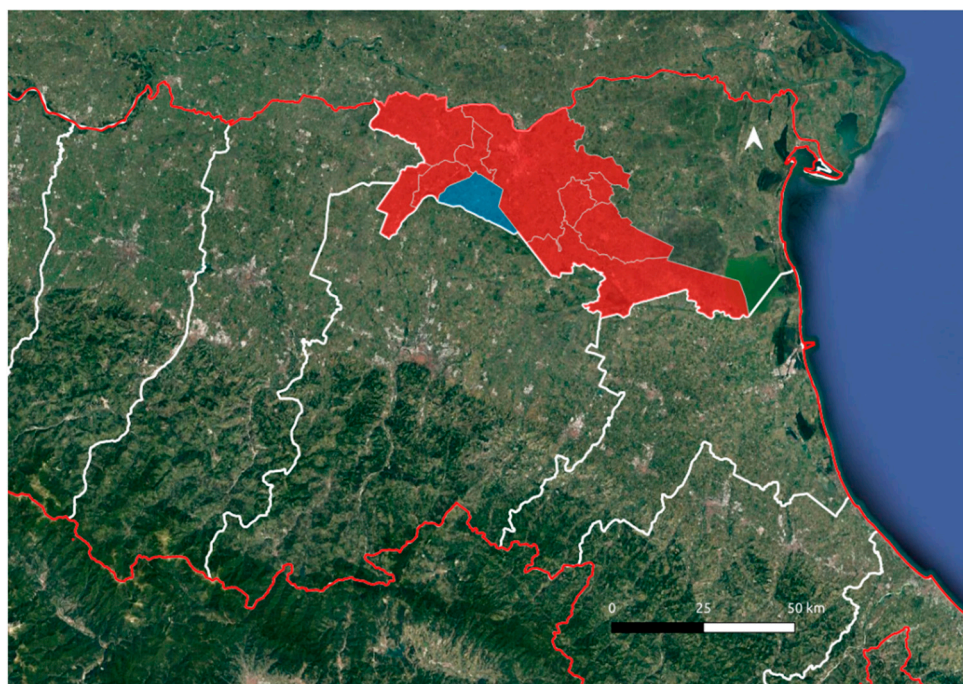

**Figure S4.** Georeferenced map of the district of Ferrara with clusters highlighted (red: municipalities belonging to the first cluster; blue: municipality belonging to the second cluster).

## ANNEX III

Table S5. Correlation matrix– District of Forlì–Cesena.

|                        | 1       | 2       | 3       | 4       | 5       | 6       | 7       | 8       | 9       | 10      | 11      |
|------------------------|---------|---------|---------|---------|---------|---------|---------|---------|---------|---------|---------|
| Bicarbonate alkalinity | 1       | 0.9928  | 0.9140  | −0.6142 | 0.9115  | 0.9591  | 0.7120  | 0.9526  | 0.8343  | 0.8627  | 0.7693  |
| Total Alkalinity       | 0.9928  | 1       | 0.9162  | −0.5946 | 0.9109  | 0.9609  | 0.7134  | 0.9539  | 0.8384  | 0.8591  | 0.7661  |
| Calcium                | 0.9140  | 0.9162  | 1       | −0.6330 | 0.9479  | 0.9770  | 0.6417  | 0.8866  | 0.8133  | 0.9291  | 0.8829  |
| pH                     | −0.6142 | −0.5946 | −0.6330 | 1       | −0.6144 | −0.6075 | −0.2479 | −0.5372 | −0.6155 | −0.5951 | −0.4693 |
| Conductivity           | 0.9115  | 0.9109  | 0.9479  | −0.6144 | 1       | 0.9722  | 0.7109  | 0.9437  | 0.8794  | 0.9810  | 0.9145  |
| Water Hardness         | 0.9591  | 0.9609  | 0.9770  | −0.6075 | 0.9722  | 1       | 0.6863  | 0.9645  | 0.8500  | 0.9492  | 0.8864  |
| Fluoride               | 0.7120  | 0.7134  | 0.6417  | −0.2479 | 0.7109  | 0.6863  | 1       | 0.7000  | 0.6206  | 0.6471  | 0.6884  |
| Magnesium              | 0.9526  | 0.9539  | 0.8866  | −0.5372 | 0.9437  | 0.9645  | 0.7000  | 1       | 0.8443  | 0.9166  | 0.8356  |
| Potassium              | 0.8343  | 0.8384  | 0.8133  | −0.6155 | 0.8794  | 0.8500  | 0.6206  | 0.8443  | 1       | 0.8705  | 0.7991  |
| Dry Residue            | 0.8627  | 0.8591  | 0.9291  | −0.5951 | 0.9810  | 0.9492  | 0.6471  | 0.9166  | 0.8705  | 1       | 0.9461  |
| Sulphate               | 0.7693  | 0.7661  | 0.8829  | −0.4693 | 0.9145  | 0.8864  | 0.6884  | 0.8356  | 0.7991  | 0.9461  | 1       |

Table S6. Eigenvalues of each Principal Component and variance explained– District of Forlì–Cesena.

| Principal Component | Eigenvalues | % Variance | Cumulated Variance |
|---------------------|-------------|------------|--------------------|
| PC1                 | 9.128       | 82.98      | 82.98              |
| PC2                 | 0.788       | 7.16       | 90.14              |
| PC3                 | 0.404       | 3.67       | 93.82              |
| PC4                 | 0.311       | 2.82       | 96.64              |
| PC5                 | 0.216       | 1.97       | 98.60              |
| PC6                 | 0.086       | 0.79       | 99.39              |
| PC7                 | 0.041       | 0.37       | 99.76              |
| PC8                 | 0.014       | 0.13       | 99.89              |
| PC9                 | 0.006       | 0.06       | 99.95              |
| PC10                | 0.006       | 0.05       | 99.999             |
| PC11                | 0.0001      | 0.001      | 100                |

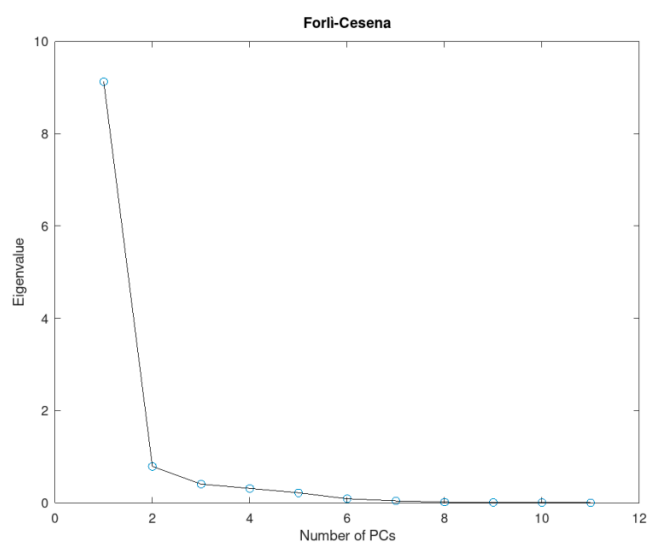

Figure S5. Scree plot – District of Forlì–Cesena.



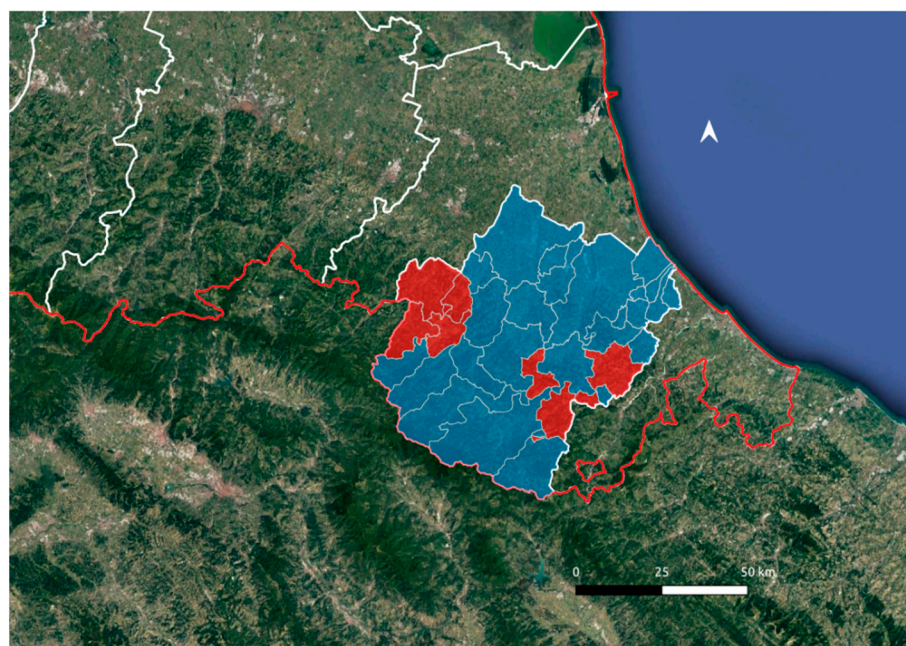

**Figure S6** Georeferenced map of the district of Forlì–Cesena with clusters highlighted (red: municipalities belonging to the first cluster; blue: municipality belonging to the second cluster)

#### ANNEX IV

**Table S7.** Correlation Matrix– District of Modena

|                        | 1       | 2       | 3       | 4       | 5       | 6       | 7       | 8       | 9       | 10      | 11      |
|------------------------|---------|---------|---------|---------|---------|---------|---------|---------|---------|---------|---------|
| Bicarbonate Alkalinity | 1       | 0.9998  | 0.7836  | −0.6694 | 0.6382  | 0.9203  | 0.5928  | 0.7110  | 0.6302  | 0.2780  | 0.3187  |
| Total Alkalinity       | 0.9998  | 1       | 0.7820  | −0.6679 | 0.6368  | 0.9212  | 0.5892  | 0.7124  | 0.6289  | 0.2761  | 0.3179  |
| Calcium                | 0.7836  | 0.7820  | 1       | −0.7971 | 0.9737  | 0.8899  | 0.8571  | 0.8298  | 0.9700  | 0.8067  | 0.8285  |
| pH                     | −0.6694 | −0.6679 | −0.7971 | 1       | −0.7478 | −0.6729 | −0.8392 | −0.8057 | −0.7511 | −0.5909 | −0.5998 |
| Conductivity           | 0.6382  | 0.6368  | 0.9737  | −0.7478 | 1       | 0.8179  | 0.8483  | 0.8000  | 0.9981  | 0.9159  | 0.9304  |
| Magnesium              | 0.9203  | 0.9212  | 0.8899  | −0.6729 | 0.8179  | 1       | 0.6905  | 0.7698  | 0.8153  | 0.5412  | 0.5833  |
| Nitrate                | 0.5928  | 0.5892  | 0.8571  | −0.8392 | 0.8483  | 0.6905  | 1       | 0.7504  | 0.8445  | 0.7471  | 0.7409  |
| Potassium              | 0.7110  | 0.7124  | 0.8298  | −0.8057 | 0.8000  | 0.7698  | 0.7504  | 1       | 0.8055  | 0.6376  | 0.6645  |
| Dry Residue            | 0.6302  | 0.6289  | 0.9700  | −0.7511 | 0.9981  | 0.8153  | 0.8445  | 0.8055  | 1       | 0.9178  | 0.9335  |
| Sodium                 | 0.2780  | 0.2761  | 0.8067  | −0.5909 | 0.9159  | 0.5412  | 0.7471  | 0.6376  | 0.9178  | 1       | 0.9944  |
| Sulphate               | 0.3187  | 0.3179  | 0.8285  | −0.5998 | 0.9304  | 0.5833  | 0.7409  | 0.6645  | 0.9335  | 0.9944  | 1       |

**Table S8.** Eigenvalues of each Principal Component and variance explained– District of Modena.

| Principal Component | Eigenvalues | % Variance | Cumulated Variance |
|---------------------|-------------|------------|--------------------|
| PC1                 | 8.472       | 77.02      | 77.02              |
| PC2                 | 1.638       | 14.89      | 91.91              |
| PC3                 | 0.487       | 4.43       | 96.33              |
| PC4                 | 0.236       | 2.14       | 98.47              |
| PC5                 | 0.117       | 1.06       | 99.54              |
| PC6                 | 0.043       | 0.39       | 99.93              |
| PC7                 | 0.004       | 0.04       | 99.96              |
| PC8                 | 0.002       | 0.02       | 99.99              |
| PC9                 | 0.001       | 0.01       | 100                |
| PC10                | 0.000       | 0.00       | 100                |
| PC11                | 0.000       | 0.00       | 100                |

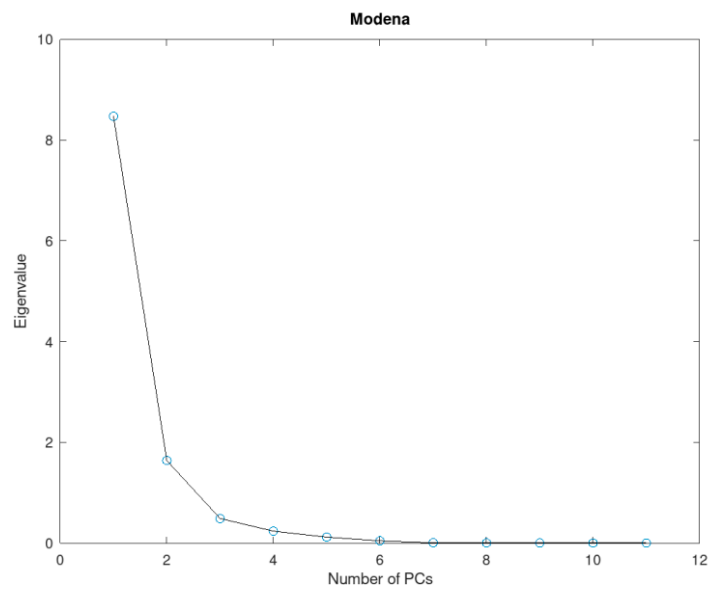

**Figure S7.** Scree plot – District of Modena.

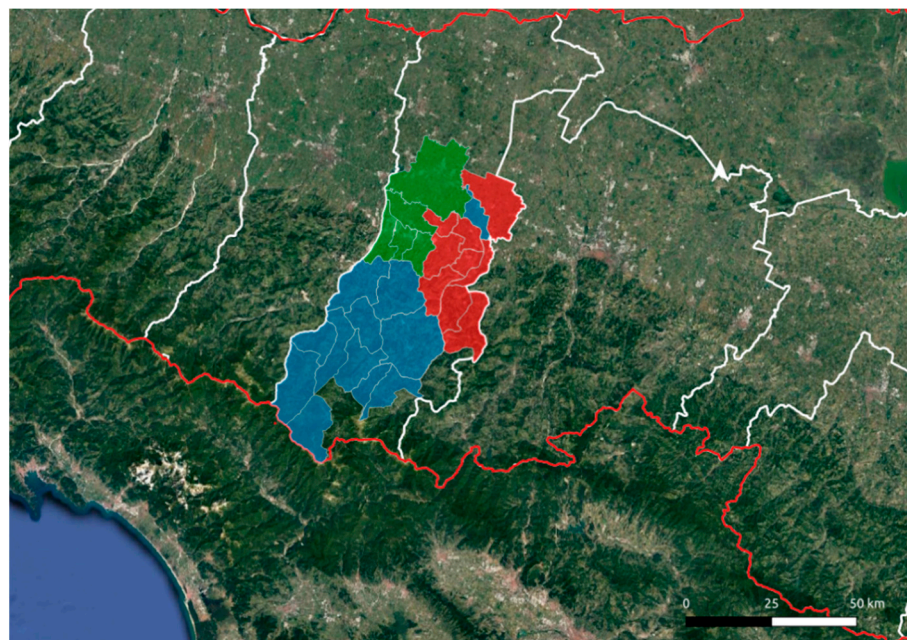

**Figure S8.** Georeferenced map of the district of Modena with clusters highlighted (red: municipalities belonging to the first cluster; blue: municipality belonging to the second cluster; green: municipalities belonging to the third cluster).

## ANNEX V

Table S9. Correlation matrix– District of Rimini.

|                        | 1      | 2      | 3      | 4      | 5      | 6      | 7      | 8      | 9      | 10     | 11     | 12     | 13     | 14     | 15     |
|------------------------|--------|--------|--------|--------|--------|--------|--------|--------|--------|--------|--------|--------|--------|--------|--------|
| Bicarbonate Alkalinity | 1      | 0.998  | 0.962  | −0.378 | 0.494  | −0.498 | 0.845  | 0.947  | 0.875  | 0.741  | 0.455  | 0.536  | 0.839  | 0.620  | 0.561  |
| Total Alkalinity       | 0.998  |        | 0.960  | −0.388 | 0.512  | −0.512 | 0.852  | 0.950  | 0.868  | 0.754  | 0.472  | 0.535  | 0.852  | 0.638  | 0.564  |
| Calcium                | 0.962  | 0.960  | 1      | −0.334 | 0.520  | −0.578 | 0.874  | 0.963  | 0.850  | 0.721  | 0.561  | 0.585  | 0.848  | 0.647  | 0.626  |
| Free Residual Chlorine | −0.378 | −0.388 | −0.334 | 1      | −0.422 | 0.547  | −0.475 | −0.456 | −0.368 | −0.594 | −0.337 | −0.442 | −0.513 | −0.440 | −0.525 |
| Chloride               | 0.494  | 0.512  | 0.520  | −0.422 | 1      | −0.607 | 0.833  | 0.657  | 0.513  | 0.794  | 0.832  | 0.594  | 0.824  | 0.940  | 0.533  |
| pH                     | −0.498 | −0.512 | −0.578 | 0.547  | −0.607 | 1      | −0.683 | −0.654 | −0.354 | −0.673 | −0.714 | −0.537 | −0.688 | −0.618 | −0.611 |
| Conductivity           | 0.845  | 0.852  | 0.874  | −0.475 | 0.833  | −0.683 | 1      | 0.954  | 0.832  | 0.923  | 0.749  | 0.784  | 0.983  | 0.916  | 0.775  |
| Water Hardness         | 0.947  | 0.950  | 0.963  | −0.456 | 0.657  | −0.654 | 0.954  | 1      | 0.867  | 0.870  | 0.644  | 0.716  | 0.945  | 0.776  | 0.739  |
| Fluoride               | 0.875  | 0.868  | 0.850  | −0.368 | 0.513  | −0.354 | 0.832  | 0.867  | 1      | 0.733  | 0.431  | 0.699  | 0.818  | 0.673  | 0.650  |
| Magnesium              | 0.741  | 0.754  | 0.721  | −0.594 | 0.794  | −0.673 | 0.923  | 0.870  | 0.733  | 1      | 0.685  | 0.809  | 0.948  | 0.879  | 0.818  |
| Nitrate                | 0.455  | 0.472  | 0.561  | −0.337 | 0.832  | −0.714 | 0.749  | 0.644  | 0.431  | 0.685  | 1      | 0.551  | 0.768  | 0.754  | 0.477  |
| Potassium              | 0.536  | 0.535  | 0.585  | −0.442 | 0.594  | −0.537 | 0.784  | 0.716  | 0.699  | 0.809  | 0.551  | 1      | 0.778  | 0.731  | 0.882  |
| Dry Residue            | 0.839  | 0.852  | 0.848  | −0.513 | 0.824  | −0.688 | 0.983  | 0.945  | 0.818  | 0.948  | 0.768  | 0.778  | 1      | 0.904  | 0.771  |
| Sodium                 | 0.620  | 0.638  | 0.647  | −0.440 | 0.940  | −0.618 | 0.916  | 0.776  | 0.673  | 0.879  | 0.754  | 0.731  | 0.904  | 1      | 0.724  |
| Sulphate               | 0.561  | 0.564  | 0.626  | −0.525 | 0.533  | −0.611 | 0.775  | 0.739  | 0.650  | 0.818  | 0.477  | 0.882  | 0.771  | 0.724  | 1      |

Table S10. Eigenvalues of each Principal Component and variance explained– District of Rimini.

| Principal Component | Eigenvalues | % Variance | Cumulated Variance |
|---------------------|-------------|------------|--------------------|
| PC1                 | 10.84       | 72.26      | 72.26              |
| PC2                 | 1.52        | 10.12      | 82.38              |
| PC3                 | 0.90        | 6.02       | 88.40              |
| PC4                 | 0.73        | 4.88       | 93.29              |
| PC5                 | 0.48        | 3.22       | 96.51              |
| PC6                 | 0.21        | 1.39       | 97.89              |
| PC7                 | 0.12        | 0.77       | 98.66              |
| PC8                 | 0.10        | 0.66       | 99.32              |
| PC9                 | 0.06        | 0.40       | 99.71              |
| PC10                | 0.02        | 0.12       | 99.84              |
| PC11                | 0.01        | 0.08       | 99.91              |
| PC12                | 0.01        | 0.05       | 99.96              |
| PC13                | 0.00        | 0.02       | 99.98              |
| PC14                | 0.00        | 0.02       | 100                |
| PC15                | 0.00        | 0.00       | 100                |

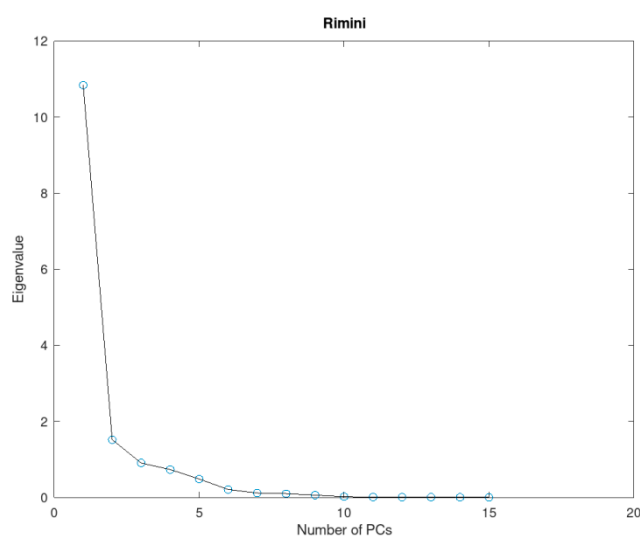

Figure S9. Scree plot – District of Rimini.

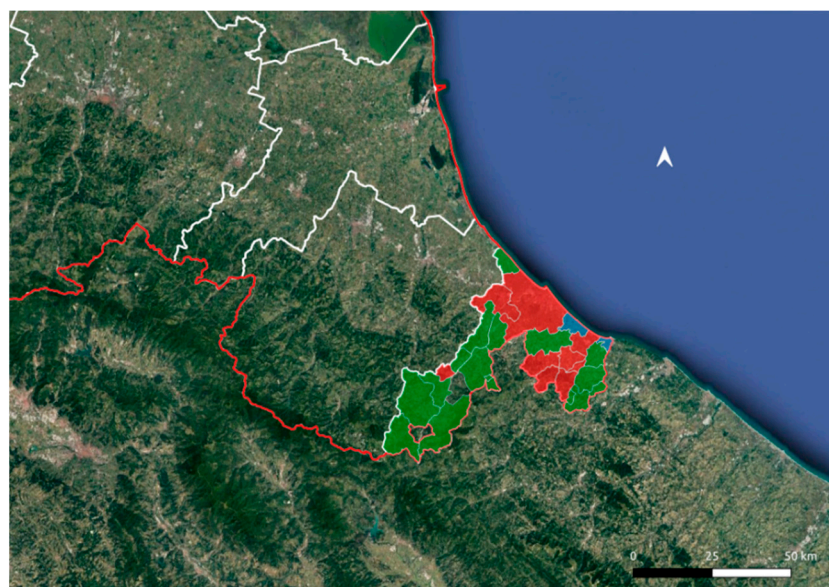

**Figure S10.** Georeferenced map of the district of Rimini with clusters highlighted (red: municipalities belonging to the first cluster; blue: municipality belonging to the second cluster; green: municipalities belonging to the third cluster).

## ANNEX VI

**Table S11.** Correlation matrix–District of Ravenna.

|                               | 1      | 2      | 3      | 4      | 5      | 6      | 7     | 8      | 9      | 10     | 11     | 12     | 13     | 14     |
|-------------------------------|--------|--------|--------|--------|--------|--------|-------|--------|--------|--------|--------|--------|--------|--------|
| <b>Bicarbonate Alkalinity</b> | 1      | 0.999  | 0.927  | 0.112  | −0.361 | 0.486  | 0.854 | 0.555  | 0.648  | −0.098 | 0.375  | 0.515  | 0.306  | 0.141  |
| <b>Total Alkalinity</b>       | 0.999  | 1      | 0.927  | 0.128  | −0.370 | 0.497  | 0.856 | 0.556  | 0.631  | −0.084 | 0.381  | 0.527  | 0.321  | 0.147  |
| <b>Calcium</b>                | 0.927  | 0.927  | 1      | 0.329  | −0.081 | 0.688  | 0.975 | 0.749  | 0.355  | 0.208  | 0.638  | 0.725  | 0.488  | 0.459  |
| <b>Chloride</b>               | 0.112  | 0.128  | 0.329  | 1      | 0.603  | 0.909  | 0.523 | 0.832  | −0.526 | 0.926  | 0.883  | 0.861  | 0.979  | 0.878  |
| <b>pH</b>                     | −0.361 | −0.370 | −0.081 | 0.603  | 1      | 0.423  | 0.087 | 0.435  | −0.640 | 0.748  | 0.506  | 0.350  | 0.482  | 0.664  |
| <b>Conductivity</b>           | 0.486  | 0.497  | 0.688  | 0.909  | 0.423  | 1      | 0.827 | 0.973  | −0.258 | 0.807  | 0.967  | 0.981  | 0.963  | 0.887  |
| <b>Water Hardness</b>         | 0.854  | 0.856  | 0.975  | 0.523  | 0.087  | 0.827  | 1     | 0.875  | 0.186  | 0.409  | 0.786  | 0.843  | 0.660  | 0.629  |
| <b>Magnesium</b>              | 0.555  | 0.556  | 0.749  | 0.832  | 0.435  | 0.973  | 0.875 | 1      | −0.170 | 0.748  | 0.961  | 0.939  | 0.901  | 0.874  |
| <b>Manganese</b>              | 0.648  | 0.631  | 0.355  | −0.526 | −0.640 | −0.258 | 0.186 | −0.170 | 1      | −0.762 | −0.405 | −0.229 | −0.367 | −0.609 |
| <b>Nitrate</b>                | −0.098 | −0.084 | 0.208  | 0.926  | 0.748  | 0.807  | 0.409 | 0.748  | −0.762 | 1      | 0.867  | 0.762  | 0.858  | 0.946  |
| <b>Potassium</b>              | 0.375  | 0.381  | 0.638  | 0.883  | 0.506  | 0.967  | 0.786 | 0.961  | −0.405 | 0.867  | 1      | 0.950  | 0.913  | 0.965  |
| <b>Dry Residue</b>            | 0.515  | 0.527  | 0.725  | 0.861  | 0.350  | 0.981  | 0.843 | 0.939  | −0.229 | 0.762  | 0.950  | 1      | 0.919  | 0.864  |
| <b>Sodium</b>                 | 0.306  | 0.321  | 0.488  | 0.979  | 0.482  | 0.963  | 0.660 | 0.901  | −0.367 | 0.858  | 0.913  | 0.919  | 1      | 0.856  |
| <b>Sulphate</b>               | 0.141  | 0.147  | 0.459  | 0.878  | 0.664  | 0.887  | 0.629 | 0.874  | −0.609 | 0.946  | 0.965  | 0.864  | 0.856  | 1      |

**Table S12.** Eigenvalues of each Principal Component and variance explained– District of Ravenna.

| Principal Component | Eigenvalues | % Variance | Cumulated Variance |
|---------------------|-------------|------------|--------------------|
| PC1                 | 9.031       | 64.504     | 64.504             |
| PC2                 | 4.110       | 29.356     | 93.859             |
| PC3                 | 0.432       | 3.087      | 96.947             |
| PC4                 | 0.326       | 2.329      | 99.276             |
| PC5                 | 0.053       | 0.376      | 99.652             |
| PC6                 | 0.044       | 0.313      | 99.966             |
| PC7                 | 0.005       | 0.034      | 100.000            |
| PC8                 | 0.000       | 0.000      | 100.000            |
| PC9                 | 0.000       | 0.000      | 100.000            |
| PC10                | 0.000       | 0.000      | 100.000            |
| PC11                | 0.000       | 0.000      | 100.000            |
| PC12                | 0.000       | 0.000      | 100.000            |
| PC13                | 0.000       | 0.000      | 100.000            |
| PC14                | 0.000       | 0.000      | 100.000            |



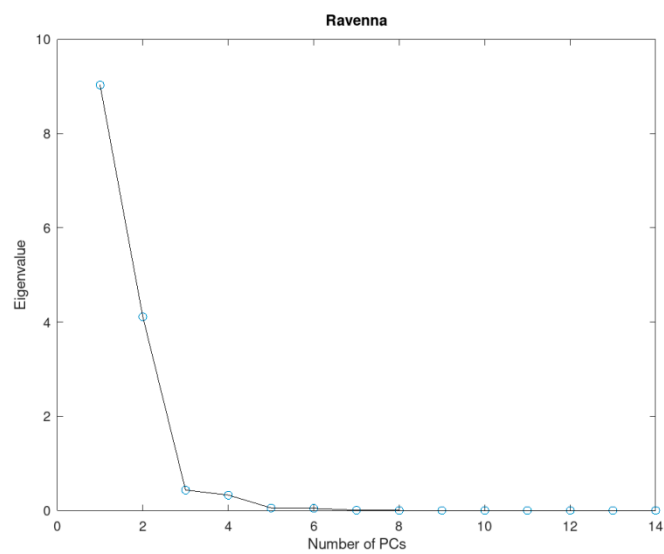

**Figure 11.** Scree plot – District of Ravenna.

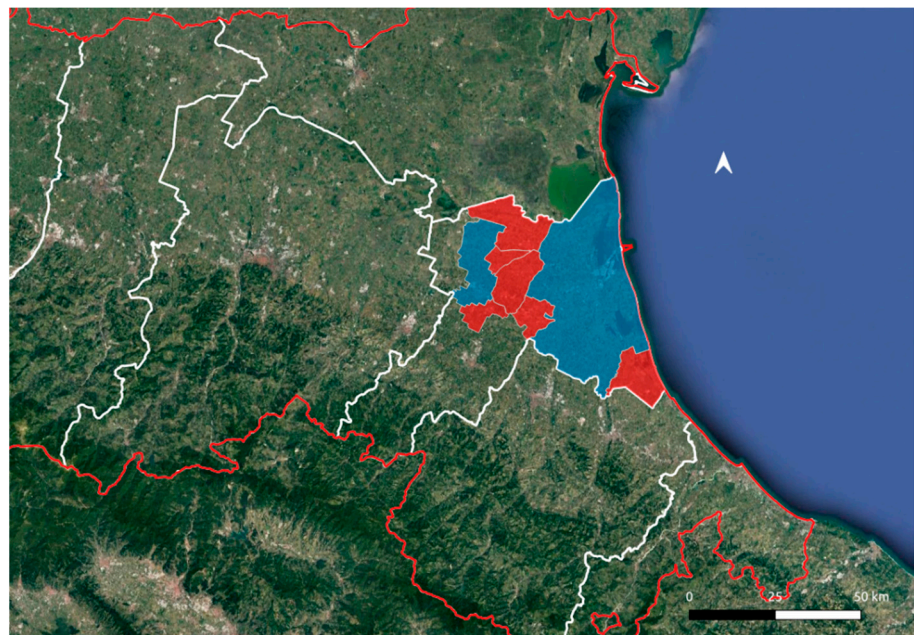

**Figure S12.** Georeferenced map of the district of Ravenna with clusters highlighted (red: municipalities belonging to the first cluster; blue: municipality belonging to the second cluster; green: municipalities belonging to the third cluster).

## ANNEX VII

Table S13. Correlation matrix– District of Imola–Faenza.

|                               | 1      | 2      | 3      | 4      | 5      | 6      | 7      | 8      | 9      | 10     | 11     | 12     | 13     | 14     |
|-------------------------------|--------|--------|--------|--------|--------|--------|--------|--------|--------|--------|--------|--------|--------|--------|
| <b>Bicarbonate Alkalinity</b> | 1      | 0.999  | 0.925  | 0.505  | −0.672 | 0.935  | 0.950  | 0.670  | 0.940  | 0.632  | 0.566  | 0.934  | 0.590  | 0.515  |
| <b>Total Alkalinity</b>       | 0.999  | 1      | 0.925  | 0.500  | −0.673 | 0.933  | 0.951  | 0.666  | 0.940  | 0.628  | 0.564  | 0.933  | 0.585  | 0.515  |
| <b>Calcium</b>                | 0.925  | 0.925  | 1      | 0.346  | −0.840 | 0.869  | 0.989  | 0.416  | 0.894  | 0.774  | 0.424  | 0.886  | 0.382  | 0.740  |
| <b>Chloride</b>               | 0.505  | 0.500  | 0.346  | 1      | −0.287 | 0.745  | 0.398  | 0.791  | 0.478  | 0.338  | 0.948  | 0.710  | 0.981  | −0.011 |
| <b>pH</b>                     | −0.672 | −0.673 | −0.840 | −0.287 | 1      | −0.677 | −0.784 | −0.223 | −0.605 | −0.824 | −0.272 | −0.692 | −0.261 | −0.610 |
| <b>Conductivity</b>           | 0.935  | 0.933  | 0.869  | 0.745  | −0.677 | 1      | 0.904  | 0.734  | 0.914  | 0.667  | 0.796  | 0.995  | 0.783  | 0.504  |
| <b>Water Hardness</b>         | 0.950  | 0.951  | 0.989  | 0.398  | −0.784 | 0.904  | 1      | 0.471  | 0.950  | 0.732  | 0.499  | 0.924  | 0.445  | 0.741  |
| <b>Fluoride</b>               | 0.670  | 0.666  | 0.416  | 0.791  | −0.223 | 0.734  | 0.471  | 1      | 0.568  | 0.133  | 0.723  | 0.685  | 0.874  | −0.084 |
| <b>Magnesium</b>              | 0.940  | 0.940  | 0.894  | 0.478  | −0.605 | 0.914  | 0.950  | 0.568  | 1      | 0.582  | 0.618  | 0.937  | 0.548  | 0.686  |
| <b>Nitrate</b>                | 0.632  | 0.628  | 0.774  | 0.338  | −0.824 | 0.667  | 0.732  | 0.133  | 0.582  | 1      | 0.371  | 0.680  | 0.306  | 0.582  |
| <b>Potassium</b>              | 0.566  | 0.564  | 0.424  | 0.948  | −0.272 | 0.796  | 0.499  | 0.723  | 0.618  | 0.371  | 1      | 0.778  | 0.934  | 0.178  |
| <b>Dry Residue</b>            | 0.934  | 0.933  | 0.886  | 0.710  | −0.692 | 0.995  | 0.924  | 0.685  | 0.937  | 0.680  | 0.778  | 1      | 0.744  | 0.563  |
| <b>Sodium</b>                 | 0.590  | 0.585  | 0.382  | 0.981  | −0.261 | 0.783  | 0.445  | 0.874  | 0.548  | 0.306  | 0.934  | 0.744  | 1      | −0.033 |
| <b>Sulphate</b>               | 0.515  | 0.515  | 0.740  | −0.011 | −0.610 | 0.504  | 0.741  | −0.084 | 0.686  | 0.582  | 0.178  | 0.563  | −0.033 | 1      |

Table S14. Eigenvalues of each Principal Component and variance explained– District of Imola–Faenza.

| Principal Component. | Eigenvalues | % Variance | Cumulated Variance |
|----------------------|-------------|------------|--------------------|
| PC1                  | 9.725       | 69.461     | 69.461             |
| PC2                  | 2.681       | 19.149     | 88.609             |
| PC3                  | 0.757       | 5.405      | 94.014             |
| PC4                  | 0.529       | 3.778      | 97.792             |
| PC5                  | 0.193       | 1.376      | 99.168             |
| PC6                  | 0.065       | 0.465      | 99.633             |
| PC7                  | 0.029       | 0.207      | 99.840             |
| PC8                  | 0.016       | 0.111      | 99.951             |
| PC9                  | 0.003       | 0.019      | 99.971             |
| PC10                 | 0.002       | 0.013      | 99.983             |
| PC11                 | 0.001       | 0.004      | 99.988             |
| PC12                 | 0.001       | 0.004      | 99.991             |
| PC13                 | 0.000       | 0.000      | 100                |
| PC14                 | 0.000       | 0.000      | 100                |

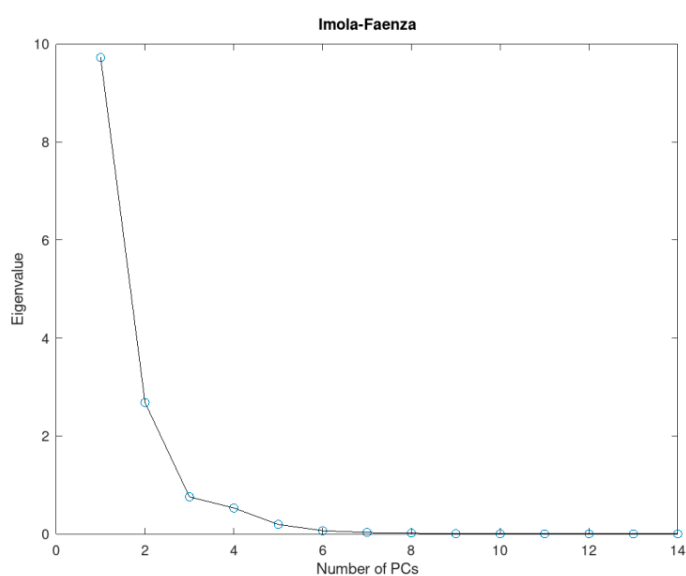

Figure S13. Scree plot – District of Imola–Faenza.

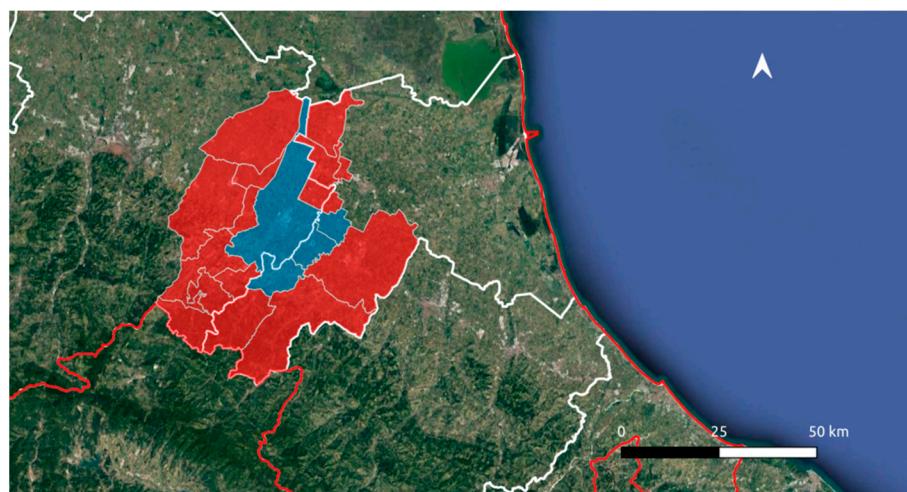

**Figure S14.** Georeferenced map of the district of Imola–Faenza with clusters highlighted (red: municipalities belonging to the first cluster; blue: municipality belonging to the second cluster; green: municipalities belonging to the third cluster).
